# Supplementary material for: Performance evaluation of catalytic ozone oxidation of norfloxacin over Ce-Ni@WSA catalysts
Source: Research Square preprint supplement (doi:10.21203/rs.3.rs-7719957/v1), 2025-10-16
Supplement: Supplementary file 1 [file 83694025e725e09a1f6bcbe6.docx]

Fig.S1. Adsorption experiment of blank silicon aluminum ball carrier








Fig.S2. Degradation effects of individual ozone oxidation and blank silicon aluminum ball carrier catalyzed ozone oxidation: (a) Nor removal rate, (b) COD removal rate











Fig.S3. Effect of Ce-Ni@WSA on Nor removal rate under different conditions: (a)Active metal combination, (b)Metal load ratio (c)Roasting temperature











Fig.S4. Effect of Ce-Ni@WSA on COD removal rate under different conditions: (a)Active metal combination, (b)Metal load ratio,(c)Roasting temperature


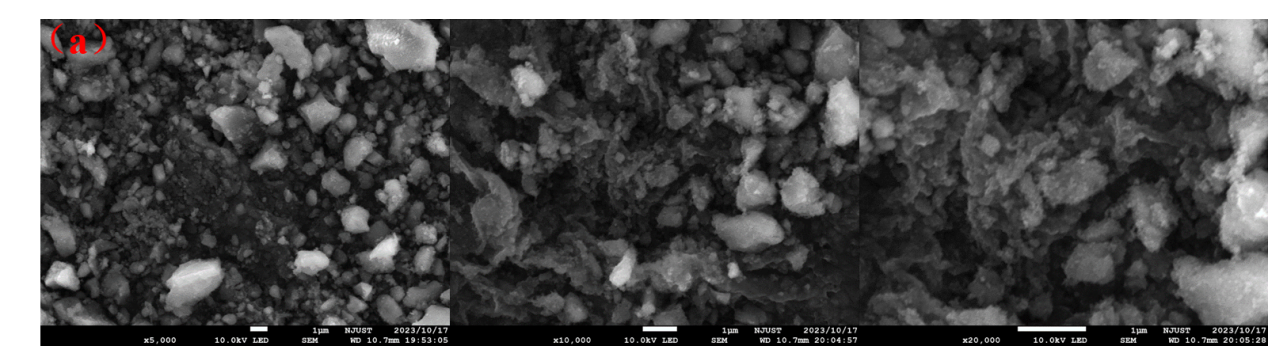


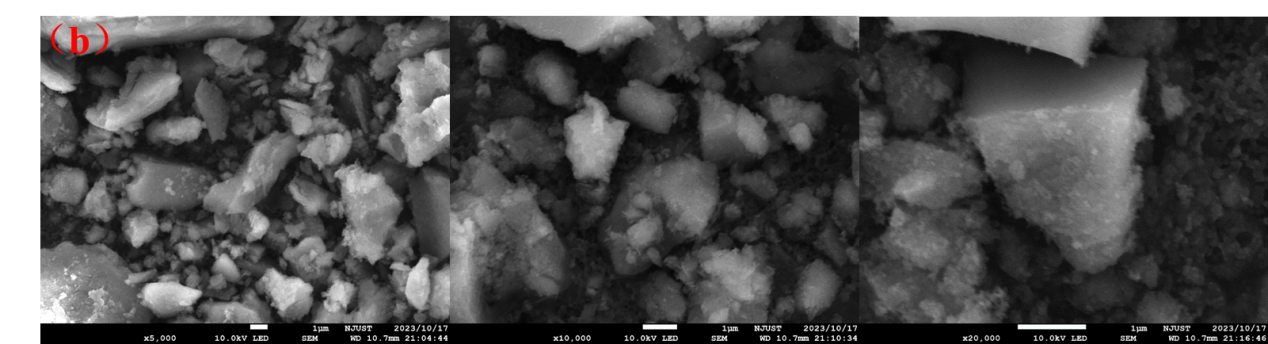


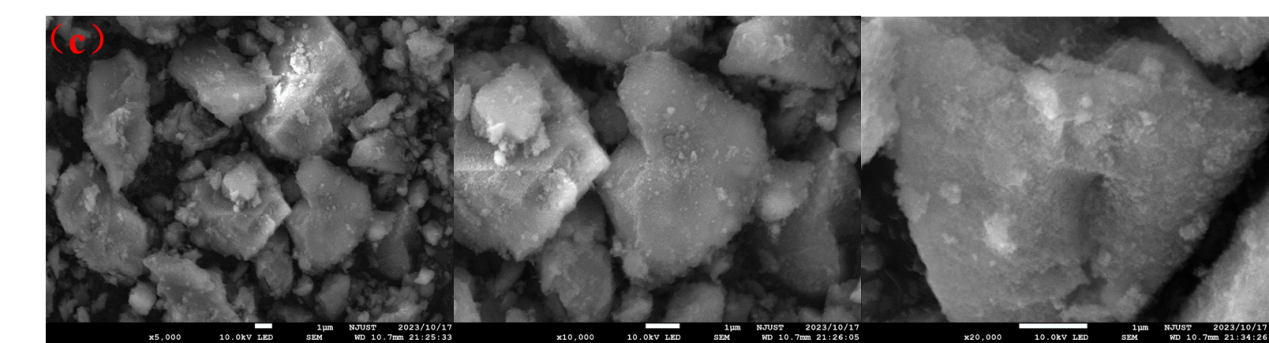


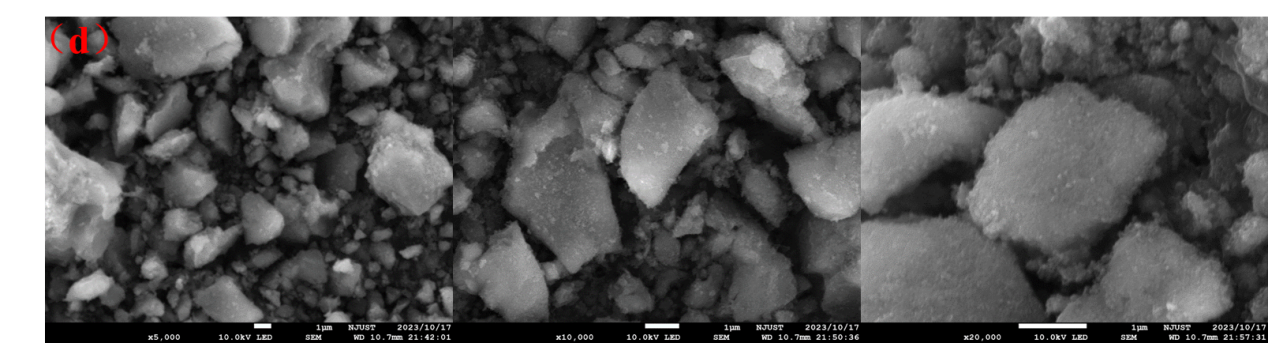


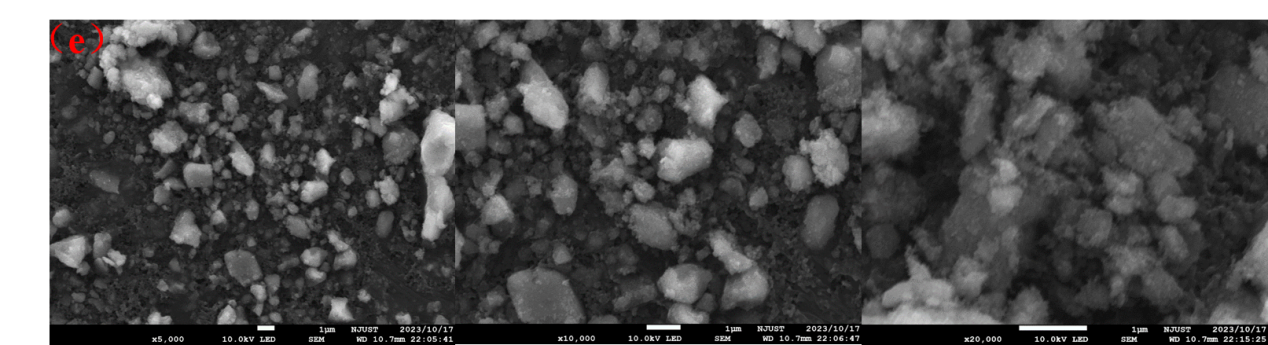


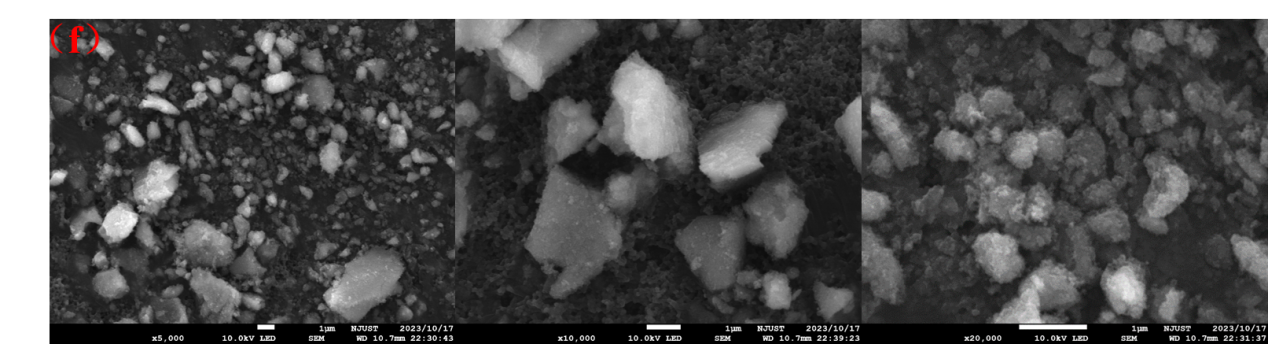


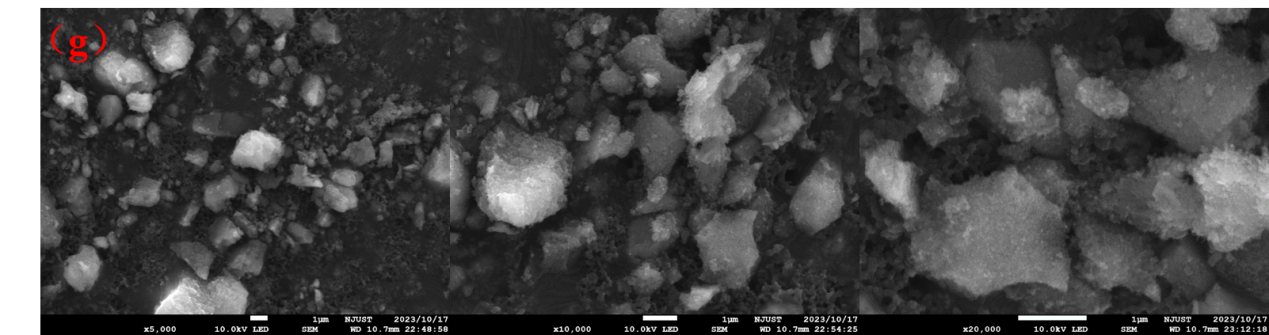


Fig. S5. SEM characterization of Ce-Ni@WSA catalysts: (a) Blank silicon aluminum ball carrier, (b) 350℃, (c) 450℃, (d) 550℃, (e) 650℃, (f) 750℃, (g) Ce-Ni@WSA repeated 50 times














Fig.S6. BET characterization of Ce-Ni@WSA : (a)Blank Silicon aluminum ball carrier, (b) Ce-Ni@WSA, (c) Ce-Ni@WSA repeated 50 times, (d) Pore size distribution








Fig.S7. Peak fitting diagram of Ce-Ni@WSA catalysts: (a)Ni, (b)Ce





Fig.S8. Mechanical strength of Ce-Ni@WSA catalysts

Table S1 Tetracycline parent compounds and degradation products

| Serial number | Chemical formula | Structural type | Molecular weight (m/z) |
| --- | --- | --- | --- |
| M1 | C16H18FN3O3 | 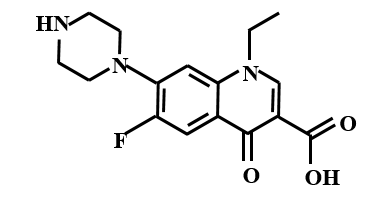 | 319 |
| Ma1 | C16H19N3O4 | 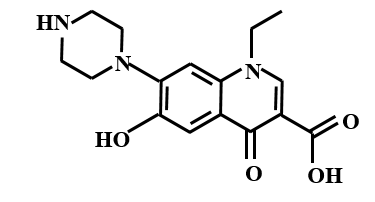 | 317 |
| Ma2 | C16H19N3O3 | 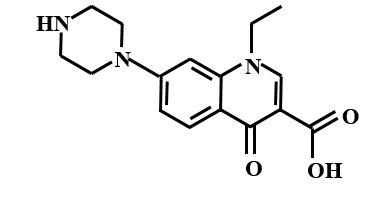 | 301 |
| Mb1 | C16H18FN3O5 | 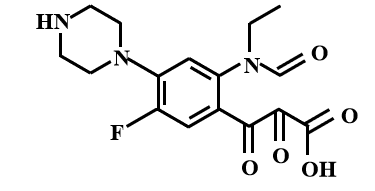 | 351 |
| Mb2 | C16H20FN3O4 | 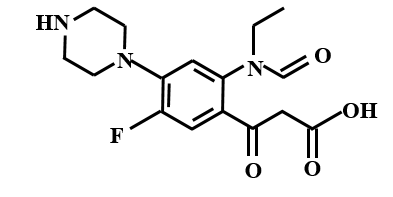 | 337 |
| Mb3 | C15H18FN3O3 | 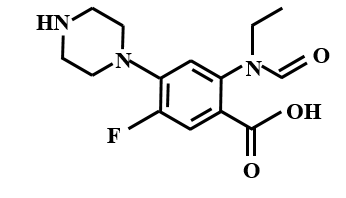 | 307 |
| Mb4 | C16H20FN3O | 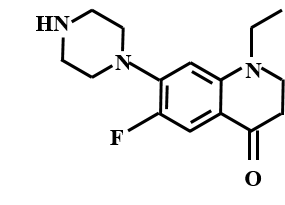 | 277 |
| Mb5 | C16H22FN3 | 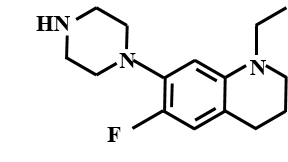 | 263 |
| Mc1 | C16H16FN3O4 | 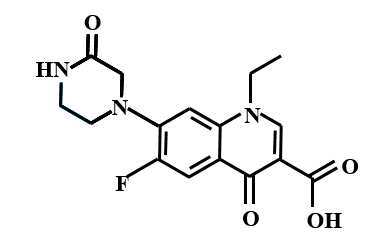 | 333 |
| Mc2 | C15H16FN3O4 | 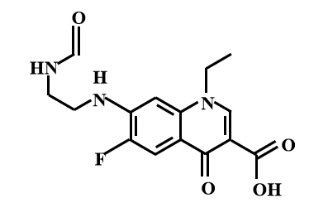 | 321 |
| Mc3 | C14H16FN3O3 | 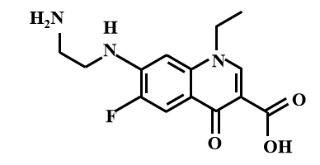 | 309 |
| Mc4 | C12H11FN2O3 | 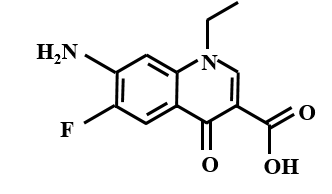 | 266 |
| Mc5 | C12H11N2O3 | 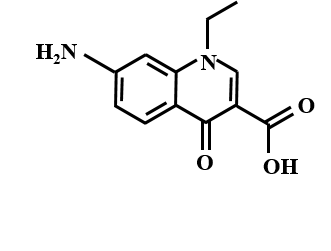 | 247 |
| Mc6 | C11H11FN2O3 | 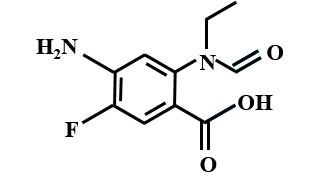 | 238 |
| Mc7 | C11H15FN2 | 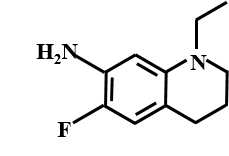 | 194 |











Fig.S9. Fitted kinetic curve for reaction of the ozone system alone: (a) zero-order, (b) first-order, (c) second-order











Fig.S10. Fitted kinetic curve for the reaction of catalytic ozonation system: (a) zero-order, (b) first-order, (c) second-order

Table S2 Fitted parameters for reaction kinetic analysis

| Reaction system | Reaction order | R2 | Reaction rate k |
| --- | --- | --- | --- |
| Individual ozone oxidation | Zero-order | 0.9502 | 0.81143 |
| First-order | 0.9490 | 0.00446 |
| Second-order | 0.9476 | 2.458×10-5 |
| Ce-Ni@WSA catalytic ozone oxidation | Zero-order | 0.9124 | 2.75257 |
| First-order | 0.9844 | 0.0447 |
| Second-order | 0.9668 | 7.971×10-4 |

Table S3 Correlation index

| Index | Serial number | Item |
| --- | --- | --- |
| Input index X | X1 | Initial pH |
| X2 | ozone dosage (g/L/h) |
| X3 | Catalyst filling ratio (%) |
| X4 | Humic acid dosage (mg/L) |
| Output index Y | Y1 | Nor removal rate (%) |
| Y2 | COD removal rate (%) |

Table S4 Evaluation criteria

| index | explanation |
| --- | --- |
| Comprehensive benefit evaluation | When θ = 1, it is DEA effective ; when θ < 1, it is non-DEA effective ; |
| Scale benefit value | When the value is 1, it is the optimal state. When it is less than 1, it is the increasing return to scale, indicating that too small scale can increase the benefit of scale increase. When it is greater than 1, it is the decreasing return to scale, indicating that too large scale can reduce the benefit of scale increase. |
| Inputs redundancy | Too much investment, need to reduce (s-) |
| Output deficiency | Too little output, need to increase (s+) |

Table S5 Research data summary

| Item | X1 | X2 | X3 | X4 | Y1 | Y2 |
| --- | --- | --- | --- | --- | --- | --- |
|
| 1 | 3 | 0.4 | 5 | 0 | 80.22 | 92.54 |
| 2 | 5 | 0.4 | 5 | 0 | 81.31 | 93.41 |
| 3 | 7.42 | 0.4 | 5 | 0 | 84.95 | 93.52 |
| 4 | 9 | 0.4 | 5 | 0 | 77.69 | 91.12 |
| 5 | 11 | 0.4 | 5 | 0 | 76.06 | 90.93 |
| 6 | 7.42 | 0.2 | 5 | 0 | 72.02 | 82.20 |
| 7 | 7.42 | 0.6 | 5 | 0 | 84.95 | 94.43 |
| 8 | 7.42 | 0.8 | 5 | 0 | 80.28 | 85.23 |
| 9 | 7.42 | 1.0 | 5 | 0 | 64.68 | 73.13 |
| 10 | 7.42 | 0.4 | 10 | 0 | 53.21 | 87.10 |
| 11 | 7.42 | 0.4 | 15 | 0 | 62.39 | 92.48 |
| 12 | 7.42 | 0.4 | 20 | 0 | 85.49 | 93.97 |
| 13 | 7.42 | 0.4 | 25 | 0 | 80.12 | 90.89 |
| 14 | 7.42 | 0.4 | 5 | 2 | 54.13 | 81.62 |
| 15 | 7.42 | 0.4 | 5 | 4 | 55.05 | 84.96 |
| 16 | 7.42 | 0.4 | 5 | 6 | 56.33 | 87.25 |
| 17 | 7.42 | 0.4 | 5 | 8 | 60.09 | 90.40 |
| 18 | 7.42 | 0.4 | 5 | 10 | 50.79 | 81.13 |

Note : X1 is the initial pH ; X2 is ozone dosage (g/L/h) ; X3 is the catalyst filling ratio (%) ; X4 is the speculative amount of humic acid (mg/L) ; Y1 is Nor removal rate (%) ; Y2 is COD removal rate (%).

Table S6 Validity analysis result

| Item | TE | SE | OE | S- | S+ | validity | |
| --- | --- | --- | --- | --- | --- | --- | --- |
| 1 | 1 | 0.954 | 0.954 | 1.892 | 2.542 | | non-DEA effective |
| 2 | 1 | 1 | 1 | 0 | 0 | | DEA effective |
| 3 | 1 | 1 | 1 | 0 | 0 | | DEA effective |
| 4 | 1 | 0.974 | 0.974 | 1.539 | 5.08 | | non- DEA effective |
| 5 | 1 | 0.972 | 0.972 | 3.481 | 6.537 | | non- DEA effective |
| 6 | 1 | 0.932 | 0.932 | 0.169 | 1.879 | | non- DEA effective |
| 7 | 1 | 1 | 1 | 0 | 0 | | DEA effective |
| 8 | 1 | 0.945 | 0.945 | 0.189 | 3.149 | | non- DEA effective |
| 9 | 1 | 0.774 | 0.774 | 0.155 | 1.108 | | non- DEA effective |
| 10 | 1 | 0.93 | 0.93 | 0 | 25.949 | | non- DEA effective |
| 11 | 1 | 0.986 | 0.986 | 0 | 21.702 | | non- DEA effective |
| 12 | 1 | 1 | 1 | 0 | 0 | | DEA effective |
| 13 | 1 | 0.967 | 0.967 | 0.048 | 2.568 | | non- DEA effective |
| 14 | 1 | 0.873 | 0.873 | 1.746 | 20.01 | | non- DEA effective |
| 15 | 1 | 0.908 | 0.908 | 3.634 | 22.124 | | non- DEA effective |
| 16 | 1 | 0.933 | 0.933 | 5.598 | 22.925 | | non- DEA effective |
| 17 | 1 | 0.967 | 0.967 | 7.733 | 22.026 | | non- DEA effective |
| 18 | 1 | 0.868 | 0.868 | 8.675 | 22.905 | | non- DEA effective |

Note : TE is technical benefit, SE is scale benefit, OE is comprehensive benefit.

Table S7 Detailed analysis results

| Item | Input redundancy rate (%) | | | | Underemployment rate of output (%) | | Return to scale  coefficient | Type | |
| --- | --- | --- | --- | --- | --- | --- | --- | --- | --- |
| X1 | X2 | X3 | X4 | Y1 | Y2 |
| 1 | 0.125 | 0 | 0 | 0 | 0.089 | 0 | 0.976 | Increasing returns to scale | |
| 2 | 0 | 0 | 0 | 0 | 0 | 0 | 1 | Fixed returns to scale | |
| 3 | 0 | 0 | 0 | 0 | 0 | 0 | 1 | Fixed returns to scale | |
| 4 | 0.171 | 0 | 0 | 0 | 0.065 | 0 | 0.974 | Increasing returns to scale | |
| 5 | 0.3 | 0 | 0 | 0 | 0.086 | 0 | 0.972 | Increasing returns to scale | |
| 6 | 0 | 0.398 | 0 | 0 | 0 | 0.685 | 0.965 | Increasing returns to scale | |
| 7 | 0 | 0 | 0 | 0 | 0 | 0 | 1 | Fixed returns to scale | |
| 8 | 0 | 0.473 | 0 | 0 | 0 | 0.037 | 0.945 | Increasing returns to scale | |
| 9 | 0 | 0.31 | 0 | 0 | 0.017 | 0 | 0.774 | Increasing returns to scale | |
| 10 | 0 | 0 | 0 | 0 | 0.488 | 0 | 0.93 | Increasing returns to scale | |
| 11 | 0 | 0 | 0 | 0 | 0.348 | 0 | 0.986 | Increasing returns to scale | |
| 12 | 0 | 0 | 0 | 0 | 0 | 0 | 1 | Fixed returns to scale | |
| 13 | | 0 | 0 | 0.193 | 0 | 0.032 | 0 | 0.967 | Increasing returns to scale | |
| 14 | 0 | 0 | 0 | 0.868 | 0.37 | 0 | 0.873 | Increasing returns to scale |
| 15 | 0 | 0 | 0 | 0.906 | 0.402 | 0 | 0.908 | Increasing returns to scale |
| 16 | 0 | 0 | 0 | 0.931 | 0.407 | 0 | 0.933 | Increasing returns to scale |
| 17 | 0 | 0 | 0 | 0.965 | 0.367 | 0 | 0.967 | Increasing returns to scale |
| 18 | 0 | 0 | 0 | 0.867 | 0.451 | 0 | 0.868 | Increasing returns to scale |

TEXT S1:

Suppose there are n DMUs, m input indexes and s output indexes, then DMUj has m inputs and s outputs, which are expressed as matrix input Xj and output Yj :

Xj=(x1j,x2j,…,xmj)T(7-1)

Yj=(y1j,y2j,…,ymj)T(7-2)

In the formula :

xij- The total input of the jth DMUi to the ith type of input, xij>0;

yij- The total input of the jth DMUi to the rth type of input, yij>0;

i=1,2, … ,m;

r=1,2, … , s;

j=1,2, … , n;

Construct the model as follows :

min[θ-ε(e-Ts-+ eTs+)] （7-3）

s.t.jλj+s+=θX0 （7-4）

jλj-s+=Y0 （7-5）

Satisfies λj ≥ 0, s + ≥ 0, s- ≥ 0, j = 1,2,..., n ;

In the formula :

ε- Dimensionless;

λj-Weight variable;

θ- Undetermined parameter variable;

s+- Relaxation variable of output;

s-- Input slack variables;
